# Supplementary material for: The antifungal protein PAF interferes with PKC/MPK and cAMP/PKA signalling of Aspergillus nidulans
Source: PubMed Central journal article supplement (PMC2814085; doi:10.1111/j.1365-2958.2009.06936.x), 2009-11-19
Supplement: mmi0075-0294-SD1.pdf [file mmi0075-0294-SD1.pdf]

## SUPPLEMENTAL DATA

**TABLE S1.** Gene-specific oligonucleotides used for the generation of DIG-dUTP-labeled hybridisation probes.

| <b>primer</b>    | <b>sequence</b>           | <b>gene</b> | <b>protein</b>                               |
|------------------|---------------------------|-------------|----------------------------------------------|
| <b>AnesmAF</b>   | 5'-CCACAGACTTGAGCGTAG-3'  | <i>esmA</i> | chitinsynthase                               |
| <b>AnesmAR</b>   | 5'-CCGTATCCATCCCAGAG-3'   |             |                                              |
| <b>AnchiAF</b>   | 5'-CCTGTATGACCTTGACCC-3'  | <i>chiA</i> | chitinase A                                  |
| <b>AnchiAR</b>   | 5'-GTTGAGGTTTCCGTGTGG-3'  |             |                                              |
| <b>AnchsAF</b>   | 5'-GTAAGACCACCATCAGCG-3'  | <i>chsA</i> | chitin synthase A                            |
| <b>AnchsAR</b>   | 5'-CGATACCTTCTCAGCCC-3'   |             |                                              |
| <b>AnGs1F</b>    | 5'-ATCATCCCTCTCCTGTCC-3'  | <i>agsB</i> | $\alpha$ -1,3-glucan synthase B              |
| <b>AnGs1R</b>    | 5'-GCTTGCCGTACTTCTTCG-3'  |             |                                              |
| <b>Anb1,3GsF</b> | 5'-GGACGAACGGTACAACAG-3'  | <i>fksA</i> | $\beta$ -1,3-glucan synthase A               |
| <b>Anb1,3GsR</b> | 5'-GCAGTGGGAATGTCAACG-3'  |             |                                              |
| <b>orlmAnF</b>   | 5'-ATCCACAACAGCATCACCC-3' | <i>rlmA</i> | ortholog of the MADS-box                     |
| <b>orlmAnR</b>   | 5'-ACAGCCTTATTTCCCGCAG-3' |             | transcription factor RlmA of <i>A. niger</i> |

**Figure S1**

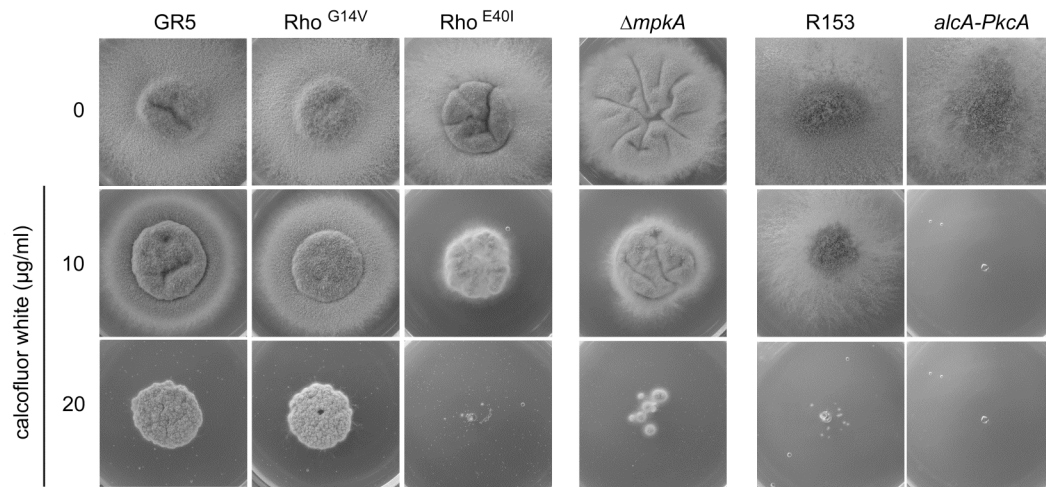

**Fig. S1:** Effect of CFW on *A. nidulans* strains defective in the activation of the components of the CWI pathway, (*rhoA*<sup>G14R</sup>, *rhoA*<sup>E40I</sup>,  $\Delta mpkA$  and *alcA-PkcA*) in comparison to the respective recipient strains (GR5 for the *rhoA*<sup>G14R</sup>, *rhoA*<sup>E40I</sup>,  $\Delta mpkA$  mutant strains, R153 for the conditional mutant *alcA-PkcA*).  $2 \times 10^3$  conidia were point inoculated on appropriately supplemented agar plates containing 0-20  $\mu\text{g/ml}$  CFW. Plates were incubated at 37°C for 48 h (RhoA and MpkA mutant strains) or for 72 h (PkcA mutant strain), respectively.

**Figure S2**

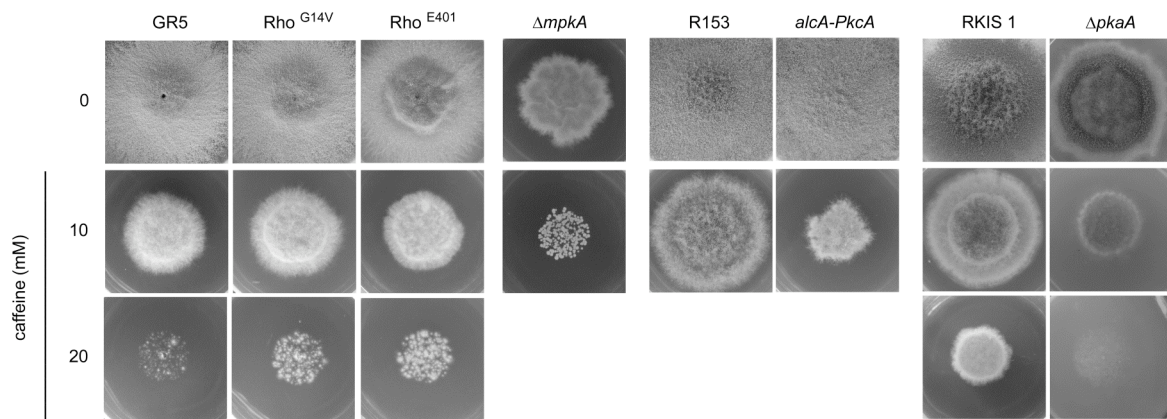

**Fig. S2:** Effect of caffeine on the growth of RhoA mutants,  $\Delta mpkA$ , *alcA-PkcA* and  $\Delta pkaA$  compared to the respective recipient strains (GR5 for both RhoA mutants and  $\Delta mpkA$ , R153 for *alcA-PkcA* and RKIS1 for  $\Delta pkaA$ ) on solid medium.  $2 \times 10^3$  conidia were point inoculated on CM containing the appropriate supplements, except for the *alcA-PkcA* mutant and its respective control strain which were grown on repressive minimal medium (MM) containing 1% glucose (Ronen *et al.*, 2007). Caffeine concentrations of 0-20 mM were tested. The *alcA-PkcA* mutant and R153 were incubated for 72 h, all other strains for 48 h.

**Figure S3**

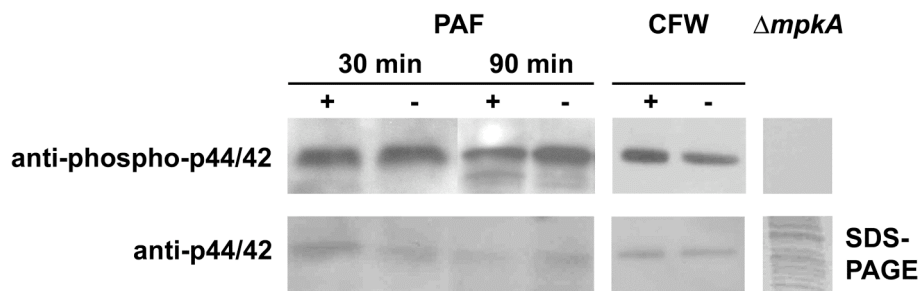

**Fig. S3:** Immunoblotting of *A. nidulans* cellular extracts with polyclonal anti-phospho p44/42 Mpk antibodies (anti-phospho-p44/42, upper panels). The lower panels show the results of immunoblotting of the PAF and CFW-treated samples with polyclonal anti-Mpk antibodies (anti-p44/42) as a loading control. Total proteins were extracted from *A. nidulans* without treatment (-), or after exposure to 50  $\mu\text{g/ml}$  PAF (+) for 30 min and 90 min, respectively, or to 20  $\mu\text{g/ml}$  CFW (+) for 90 min. Cellular extract from the  $\Delta mpkA$  mutant strain was used to prove anti-phospho-p42/44 antibody specificity (upper panel). Coomassie-stained cellular extract of the  $\Delta mpkA$  mutant after SDS-PAGE is shown as loading control (lower panel). 10-20  $\mu\text{g}$  protein extract was loaded per lane on a 10% SDS-polyacrylamide gel.

**Figure S4**

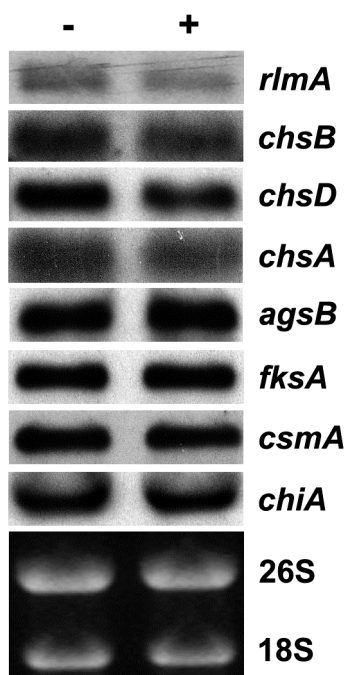

**Fig. S4:** Northern blot analysis of genes involved in cell wall biogenesis and remodeling. Sixteen hours old *A. nidulans* cultures were exposed to 0 (-) and 50 µg/ml PAF (+) for 3 h. Ten µg total RNA was loaded per lane and gene expression was detected by hybridizing the blotted samples with the respective DIG-dUTP-labeled probe. The lowest panel shows the 26S and 18S rRNA stained with ethidium bromide as loading control.

**Figure S5**

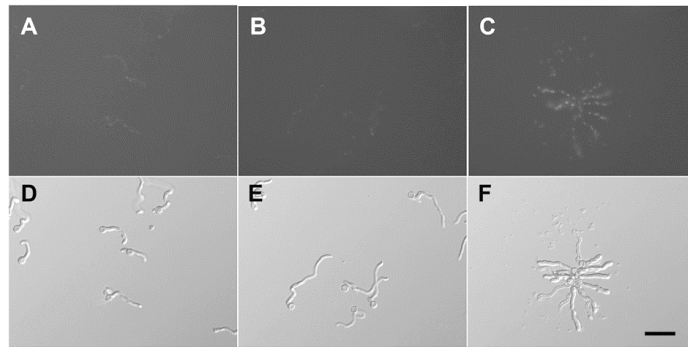

**Fig. S5:** Microscopic analysis of *A. niger* strain RD6.47 expressing a nucleus-targeted GFP under the control of the *A. niger agsA* promoter. Five hours old germlings were treated with 100 µg/ml PAF (**B**, **E**) or 10 µg/ml caspofungin (**C**, **F**) as a positive control for additional 2 h. Untreated germlings served as negative control (**A**, **D**). Nuclear staining was monitored by fluorescence microscopy (**A-C**) as described in Materials and Methods. (**D-F**) represent differential interference contrast images of the respective germlings. Scale bar, 20 µm.

**Figure S6**

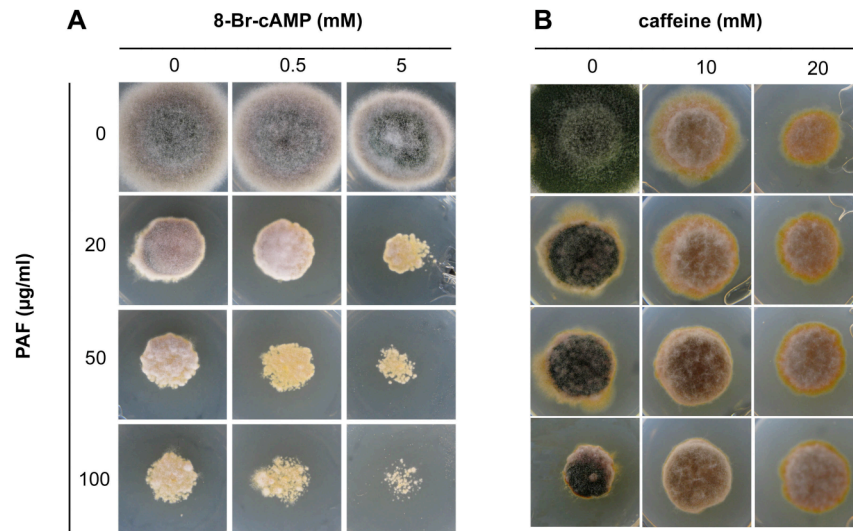

**Fig. S6:** Effect of the cAMP/PkaA signaling pathway modulating substances 8-Br-cAMP **(A)** and caffeine **(B)** in combination with PAF on the growth of *A. nidulans* FGSC4A.  $2 \times 10^3$  conidia were point inoculated on CM agar plates containing 0-100 µg/ml PAF combined with 0-5 mM 8-Br-cAMP or 0-20 mM caffeine. Plates were incubated at 37°C for 48 h in **(A)** and for 72 h in **(B)**.

**Figure S7**

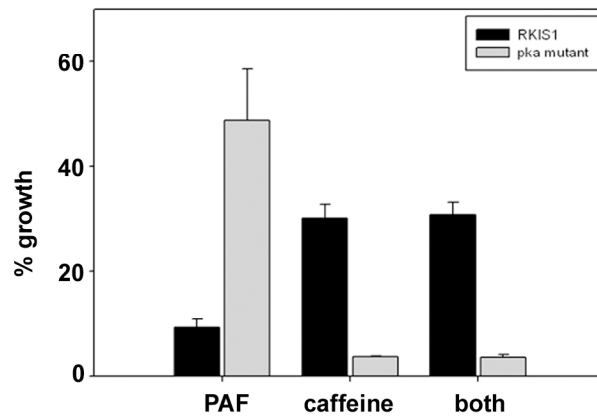

**Fig. S7:** Liquid growth inhibition assay of *A. nidulans*  $\Delta pkaA$  and *RKIS1* exposed to PAF (5  $\mu\text{g/ml}$ ), caffeine (10 mM) or to a combination of both substances. The % growth was calculated from % changes in  $\text{OD}_{620}$  of compound-treated conidia compared to the untreated control (=100%). Note that for growth assays in liquid culture (96-well plates) less concentration of growth inhibitory compounds is needed compared to agar plate assays.
